# Supplementary material for: Strain- and plasmid-level deconvolution of a synthetic metagenome by sequencing proximity ligation products
Source: PeerJ. 2014 May 27;2:e415. doi: 10.7717/peerj.415 (PMC4045339; doi:10.7717/peerj.415)
Supplement: Table S3 — The number of Hi-C read pairs associating each genomic replicon in the mock community is shown without normalization. [file peerj-02-415-s010.xlsx]

## Sheet: Sheet1
	Bur2	Bur1	K12	BL21	Lac0	Lac1	Lac2	Ped
Bur2	239305	4908	111	199	517	16	84	385
Bur1	4908	161432	74	127	396	14	49	264
K12	111	74	160137	244	252	5	26	222
BL21	199	127	244	348021	497	7	61	458
Lac0	517	396	252	497	2302389	10816	57786	1501
Lac1	16	14	5	7	10816	31659	1085	28
Lac2	84	49	26	61	57786	1085	138921	111
Ped	385	264	222	458	1501	28	111	547694
