# Supplementary material for: Strain- and plasmid-level deconvolution of a synthetic metagenome by sequencing proximity ligation products
Source: PeerJ. 2014 May 27;2:e415. doi: 10.7717/peerj.415 (PMC4045339; doi:10.7717/peerj.415)
Supplement: Table S4 — Shown are the counts of Hi-C read pairs associating each pair of replicons included in the synthetic community, normalized as described in the methods. [file peerj-02-415-s011.xlsx]

## Sheet: Sheet1
	Bur2	Bur1	K12	BL21	Lac0	Lac1	Lac2	Ped
Bur2	22375775	673634	15820	13067	4999	8418	9733	16050
Bur1	673634	32523886	15482	12241	5620	10813	8334	16155
K12	15820	15482	34791627	24423	3714	4010	4592	14108
BL21	13067	12241	24423	16048911	3375	2586	4963	13409
Lac0	4999	5620	3714	3375	2302389	588559	692463	6471
Lac1	8418	10813	4010	2586	588559	93744228	707501	6569
Lac2	9733	8334	4592	4963	692463	707501	19948758	5734
Ped	16050	16155	14108	13409	6471	6569	5734	10180848
